# Supplementary material for: Nomogram-derived prediction of pathologic complete response (pCR) in breast cancer patients treated with neoadjuvant chemotherapy (NCT)
Source: Research Square preprint supplement (doi:10.21203/rs.3.rs-39809/v3), 2020-10-14
Supplement: Supplementary file 2 [file 8680315501cabf8df7d31e95.docx]

**Table captions：**

Table 1. Clinicopathological characteristics of 165 patients treated with neoadjuvant chemotherapy (NCT)

Abbreviations: NCT, Neoadjuvant chemotherapy; BMI, body mass index; IDC, Invasive ductal carcinoma; HER2, Human epidermal growth factor receptor 2;LVI: lymphovascular invasion; pCR: pathologic complete response

Table 2. Univariate and multivariate analysis of clinical and pathologicalal response rates by biological factors

Abbreviations: OR: odds ratio; CI: confidence interval; BMI, body mass index; pCR: pathologic complete response; NCT: Neoadjuvant chemotherapy; IDC: Invasive ductal carcinoma; HER2: Human epidermal growth factor receptor;LVI: lymphovascular invasion

Supplementary table 1. Model development of risk point

Abbreviations: NCT: Neoadjuvant chemotherapy; LVI: lymphovascular invasion

Supplementary table 2. Predictive values and sensitivity, specificity of the predicted probability at different cutoff values

Abbreviations: PPV: positive predictive value；NPV: negative predictive value

Supplementary table 3. The diagnostic odds ratio (DOR) of the nomogram at different cutoff values.

Supplementary table 4. Predictive values and sensitivity, specificity of the predicted probability at the optimal cutoff value

Abbreviations: PPV: positive predictive value；NPV: negative predictive value
